# Supplementary material
Source: PubMed Central journal article supplement (PMC8283662)
Supplement: jamaophthalmol-e212413-s001.pdf [file jamaophthalmol-e212413-s001.pdf]

1  
2  
3  
4 **A Randomized Controlled Trial for Combined**  
5 **Patching and Atropine versus Patching**  
6 **in the Treatment of Children with Severe Amblyopia**  
7

8 **Protocol**  
9

10  
11  
12 **Summary**  
13

14  
15 **Objectives:**

16 To compare the effectiveness of atropine combined patching therapy and patching therapy in  
17 children with severe amblyopia (20/100 or worse) aged 3 to 12 years.  
18

19 **Design:**

20 This is a single center, randomized controlled trial.  
21

22 **Participants:**

23 Children with severe amblyopia (20/100 or worse) aged 3 to 12 years resulting from strabismus,  
24 anisometropia, or both.  
25

26 **Inclusion criteria:**

- 27 1) Age 3 to 12 years old.  
28 2) BCVA of 20/100 or poorer in the worse eye.  
29 3)  $\geq 2$  lines interocular difference in BCVA.  
30 4) No previous treatment for amblyopia except refractive correction.  
31 5) Amblyopia associated with strabismus, anisometropia, or both.

32 **Exclusion criteria:**

- 33 1) Ocular causes for reduced visual acuity  
34 2) Myopia  
35 3) History of intraocular surgery  
36 4) Allergic to atropine or other cycloplegics  
37

38 **Research procedure:**

39 The participants are stratified by age (3 to 6 years and 7 to 12 years). Then  
40 participants of each stratification are randomly assigned to either atropine combined patching group  
41 (AP group) or patching group (P group).

42 **AP group:** 1 drop of atropine sulfate 1% eye gel once every two days, and patching for 6 hours per  
43 day.

44 **P group:** patching for 6 hours per day.

45

46 **Primary and secondary outcomes:**

47 The primary outcome measure was the change of VA in the amblyopic eye from baseline to 6  
48 months.

49 The secondary outcome measures were as follows:

- 50 1) the change of VA in the amblyopic eye from baseline to 3 months,  
51 2) the proportions of patients with VA of 20/32 or better in the amblyopic eye at 6 months,  
52 3) the proportions of patients with acuity decrease of 1 line or more in the fellow eye at 6 months.

53

54

55 **Plan of follow-up:**

56

|                        | Baseline | 3-month Visit | 6-month Visit |
|------------------------|----------|---------------|---------------|
|                        | -2w~0w   | 3mon±1w       | 6mon±1w       |
| Informed consent       | √        |               |               |
| Inclusion criteria     | √        |               |               |
| Cycloplegic refraction | √        | √             | √             |
| BCVA                   | √        | √             | √             |
| Ocular alignment       | √        |               | √             |
| Stereoacuity           | √        |               | √             |

57

58

59

60

61

62

63

64

65

66

67

68

69

70

71

72

73

74

75

76

77

78 Study Summary Flow Chart

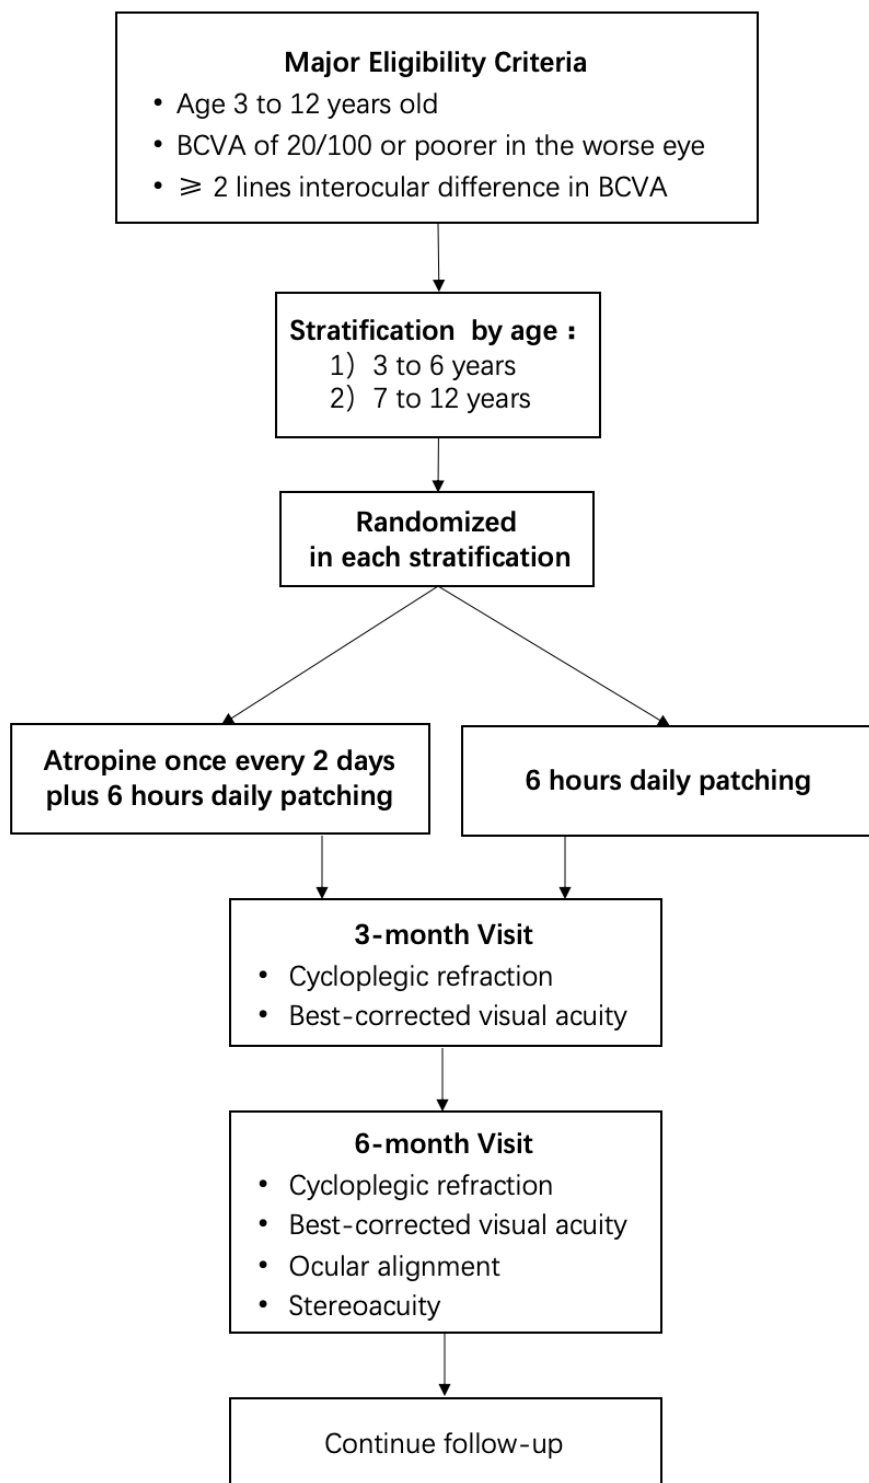

79  
80  
81  
82  
83  
84  
85

86 **1. Background**

87 Amblyopia is the most common cause of monocular vision impairment in children, young people,  
88 and even middle-aged people,<sup>1,2</sup> with a prevalence rate of 2% to 3%.<sup>2,3</sup> Without timely and effective  
89 treatment, the visual impairment caused by amblyopia will continue for life, not only for patients and  
90 their families, but also for the potential heavy burden on public health resources.

91 In the treatment of non-deprivation amblyopia, proper refractive correction is the first step. The  
92 second is to promote use of the amblyopic eye by occluding or blurring the fellow eye,<sup>3</sup> such as  
93 patching and atropine 1%. Patching therapy has been the standard treatment for amblyopia since it was  
94 proposed in the middle of the 18th century,<sup>4</sup> and it is currently the first choice of most ophthalmologists.  
95 <sup>5</sup>

96 The treatment of severe amblyopia has always been difficult in clinical work. Patients with severe  
97 amblyopia (20/100 to 20/400) have very low vision in the amblyopic eye, which is too low for patients  
98 to live normally after patching the fellow eye, so they have poor compliance. Therefore, patching  
99 therapy is often not effective enough for severe amblyopia.

100 In recent years, atropine therapy has been supported as an alternative to patching therapy for  
101 moderate amblyopia, and has gradually become one of the main methods of amblyopia treatment.<sup>6</sup>  
102 Previous studies have shown that the compliance of atropine therapy is better than that of patching  
103 therapy.<sup>5,7</sup> However, although a randomized trial showed weekend atropine was effective to severe  
104 amblyopia aged 3 to 6 years old,<sup>8</sup> the blurring effect of atropine was considered to be insufficient to the  
105 sound fellow eye of severe amblyopia.<sup>7,9,10</sup>

106 So, could atropine combined with patching therapy improve compliance and promote use of the  
107 amblyopic eye, thereby improve the treatment efficiency of patients with severe amblyopia? A  
108 randomized study including children aged 7 to 12 years with severe amblyopia showed patients in the  
109 treatment group (prescribed patching combined optical correction plus daily atropine sulfate) improved  
110 more in VA than patients with optical correction alone.<sup>11</sup> And in our pioneer clinical work, it was found  
111 atropine combined patching therapy seemed to be more effective than patching alone in newly  
112 diagnosed patients with severe amblyopia.

113

114 **2. Objectives:**

115 To compare the effectiveness of atropine combined patching therapy and patching therapy in  
116 children with severe amblyopia (20/100 or worse) aged 3 to 12 years.

117

118 **3. Design:**

119 This is a single center, randomized controlled trial.

120

121 **4. Participants Selection**

122 **4.1 Eligibility Assessment and Informed Consent**

123 According to the routine diagnosis procedures, cycloplegic refraction using cyclopentolate  
124 hydrochloride 1% and the test of best-corrected visual acuity (BCVA) will be performed on the patients  
125 who come to the strabismus and amblyopia clinic of Eye & ENT Hospital of Fudan University,  
126 Shanghai, China.

127 The investigator will communicate with the patients who meet the eligibility criteria and their legal  
128 guardians, and the patients who give their informed consent will be included in the study.

129 **4.2 Eligibility criteria**

130 **Inclusion criteria:**

- 131 1) Age 3 to 12 years old.
- 132 2) BCVA of 20/100 or poorer in the worse eye.
- 133 3)  $\geq 2$  lines interocular difference in BCVA.
- 134 4) No previous treatment for amblyopia except refractive correction, and the correction is less than  
135 one month.
- 136 5) Amblyopia associated with strabismus, anisometropia, or both.
- 137 a) Strabismic amblyopia : amblyopia in the presence of (1) strabismus at a distance and/or near  
138 fixation with/without spectacle correction, or a history of strabismus surgery and (2) refractive  
139 error below the criteria for anisometropic amblyopia.
- 140 b) Anisometropic amblyopia : amblyopia in the presence of (1)  $\geq 1.00$  D difference in hyperopia  
141 or  $\geq 1.50$  D difference in astigmatism in any meridian and (2) without strabismus at a distance  
142 and near fixation.
- 143 c) Mixed amblyopia: amblyopia in the presence of (1) strabismus at a distance and/or near  
144 fixation with/without spectacle correction, or a history of strabismus surgery and (2)  
145 anisometropia of  $\geq 1.00$  D difference in hyperopia or  $\geq 1.50$  D difference in astigmatism in any  
146 meridian.

147 **Exclusion criteria:**

- 148 1) Ocular causes for reduced visual acuity
- 149 2) Myopia
- 150 3) History of intraocular surgery
- 151 4) Allergic to atropine or other cycloplegics

152 **4.3 Enrollment Examination Procedures**

153 Ocular alignment, stereoacuity and ocular examination are examined. Ocular alignment is assessed  
154 using the simultaneous prism and cover test and the prism and alternate cover test; stereoacuity is  
155 assessed with the Titmus Stereo Test (Stereo Optical Co., Inc.). Ocular examination is performed to  
156 rule out any cause for reduced visual acuity other than amblyopia. All the examinations should be  
157 completed within 14 days before the randomization.

158

159 **5. Randomization and Masking**

160 The participants are stratified by age (3 to 6 years and 7 to 12 years). Then  
161 participants of each stratification are randomly assigned to either atropine combined patching group  
162 (AP group) or patching group (P group). The two randomization sequences will be generated in a 1:1  
163 ratio by producing the unique random-number list using SPSS software (version 20).

164 Because the pupil of patients in the AP group will be dilated due to atropine, patients and their  
165 parents/guardians could not be masked to the treatment. In order to reduce the bias of outcome  
166 measurement as much as possible, the vision examiner will be masked to treatment group (see 7.2.1).

167

168 **6. Treatment**

169 **6.1 Optical Correction**

170 All of the participants are given optical correction (if needed). Patients can continue to wear the  
171 original spectacles if their spectacles meet the follow requirements. Otherwise, glasses need to be  
172 replaced.

- 173 • For patients with accommodative esotropia

174 1) hyperopia should be full corrected according to the cycloplegic refraction using atropine 1%.

175 2) astigmatism should be within 0.50 D of fully corrected.

176 3) anisometropia (spherical equivalent) should be within 0.50 D of fully corrected.

177 • For other patients

178 1) hyperopia should not be undercorrected by more than +2.0 D spherical equivalent.

179 2) astigmatism should be within 0.50 D of fully corrected.

180 3) anisometropia (spherical equivalent) should be within 0.50 D of fully corrected.

## 181 **6.2 Patching and Atropine**

182 • AP group: 1 drop of atropine sulfate 1% eye gel (Shenyang Xingqi Pharmaceutical Co.,Ltd.) once a  
183 day for the first 3 days and then once every two days, and patching for 6 hours per day.

184 The investigator decided to use atropine at this frequency based on our clinical experience. We had  
185 tried daily patching plus atropine 1% on two consecutive days per week for children with **severe**  
186 **amblyopia**, on the evidence that weekend atropine without patching was as effective as once daily  
187 atropine 1% for **moderate amblyopia**. But, based on a rough estimation, it seemed that patching plus  
188 weekend atropine was not more effective than patching alone for severe amblyopia. Therefore, we  
189 changed to use atropine 1% once a day for 3 days to achieve full cycloplegia and then once every 2  
190 days to see whether it will work.

191 Parents were noted to wear sunglasses or hat for children outdoor to avoid the sunlight exposure.

192 • P group: patching for 6 hours per day.

193 For the patching regimen in both groups, we emphasized to parents that the patching time should be  
194 continuous and patching after kindergarten would be better since children might not like being different  
195 from others in kindergarten. If it is less than 6 hours of the after kindergarten time on workday, an  
196 alternative of patching for 4 hours on workday and 11 hours on weekend is provided.

197 The study will provide adhesive skin patches (Guangzhou Kanweila Healthcare Co.,Ltd). Children  
198 allergic to the eye patch will use a cloth patch mounted on the eyeglass frame.

199 If BCVA in the amblyopic eye improved to be equal to or only 1 line worse than that in the fellow  
200 eye at the 3-month visit, patching time would be decreased to 2 hours per day and atropine would be  
201 reduced to 2 times a week. If BCVA in the amblyopic eye became better than that in the fellow eye or  
202 reverse amblyopia occurred in the fellow eye, it would be judged by the investigator whether the  
203 treatment should be continued, reduced or stopped.

## 204 **6.3 Near Activities**

205 Patients in both groups are also instructed to do near-visual activities for at least 1 hour during the  
206 patching time, such as Written homework, reading, painting and video games.

## 207 **6.4 Home Record of the treatment**

208 Parents are asked to record the number of hours of patching in both groups and to record the day of  
209 using atropine in the AP group.

210

## 211 **7. Follow-up Procedure**

212 **7.1 The plan of follow-up is listed in Table 1.**

213 **Table 1.**

|                  | Baseline | 3-month Visit | 6-month Visit |
|------------------|----------|---------------|---------------|
|                  | -2w~0w   | 3mon±1w       | 6mon±1w       |
| Informed consent | √        |               |               |

|                        |   |   |   |
|------------------------|---|---|---|
| Inclusion criteria     | √ |   |   |
| Cycloplegic refraction | √ | √ | √ |
| BCVA                   | √ | √ | √ |
| Ocular alignment       | √ |   | √ |
| Stereoacuity           | √ |   | √ |

214 **7.2 Testing Procedures**

215 **7.2.1 Best-corrected Visual Acuity**

216 At each visit, BCVA with a cycloplegic refraction was measured in both eyes using the Standard  
217 Logarithm Visual Acuity Chart (E optotype).

218 The vision examiner will be masked to treatment group, for the children are mydriatic when they  
219 meet the examiner.

220 • For children in the AP group, the fellow eye will be tested with full cycloplegic correction in the  
221 use of atropine. The amblyopic eye will be tested with full cycloplegic correction using cyclopentolate  
222 hydrochloride 1%.

223 • For children in the P group, both eyes will be full cycloplegic correction using cyclopentolate  
224 hydrochloride 1%.

225 **7.2.2 Ocular Alignment and Stereoacuity**

226 At the 6-month visit, ocular alignment and stereoacuity are measured in the P group and at a second  
227 visit after discontinuance of atropine for 2 weeks in the AP group.

228 **7.3 Follow-up after 6 months**

229 Since severe amblyopia often cannot be cured for 6 months, the plan of treatment and follow-up  
230 depend on the 6-month VA of each patient.

231 • For patients whose VA becomes equal in both eyes, amblyopia treatment will be stopped and the  
232 refraction correction is continued. We advise a visit after 3 months to check whether there is any  
233 decrease in the amblyopic-eye VA.

234 • For patients who are not cured, the hours of patching time and the frequency of atropine will be  
235 decided by the investigator according to the 6-month VA. The treatment will last until VA becomes  
236 equal in both eyes or the VA in the amblyopic eye does not improve for 6 months.

237

238 **8. Adverse Events and Side Effects**

239 **8.1 Adverse Events**

240 Comparing to amblyopic patients who do not participate in this study, there was no additional risk.

241 **8.2 Side Effects of Atropine**

242 Atropine 1% could cause photosensitivity and conjunctival irritation. Adverse systemic effects  
243 include dryness of the mouth and skin, fever, fever, flushing, and tachycardia.

244 To minimize the risks, parents are advised as follows:

245 • Applying direct digital pressure over the lacrimal sac and puncta for 20 to 30 seconds to reduce  
246 systemic absorption and toxicity.

247 • Wear sunglasses and/or a hat for the children.

248 If atropine should be discontinued due to serious side effects, the patient can use homatropine 5%  
249 instead.

250 **8.3 Side Effects of Patching**

251 Patching could cause skin irritation. Children allergic to the eye patch would switch to use a cloth  
252 patch mounted on the eyeglass frame.

253 **8.4 Reverse Amblyopia**

254 It has been reported transient reduction of visual acuity in the fellow eye due to patching or atropine.  
255 The investigator will pay attention to VA in the fellow eye of participants. For the participant whose VA  
256 in the fellow eye decreased 1 line or more from the baseline, the VA would be tested again, and  
257 whether to continue, reduce or stop the treatment was at senior investigator discretion. The subsequent  
258 follow-up data of VA in the fellow eye were used to evaluate whether the reduction was permanent or  
259 not.

260 **8.5 Development of Strabismus or Diplopia**

261 Parent/guardian is advised to have their child see the investigator if the child develops an ocular  
262 deviation or the preexisting squint angle increases obviously. If the deviation is confirmed, whether to  
263 continue or discontinue the treatment will base on the opinions of investigator and parent.

264 According to our clinical experience, there are few cases of diplopia developed during the amblyopia  
265 treatment in children younger than 12 years old, and the diplopia usually disappear soon.

266

267 **9. Primary and Secondary Outcomes**

268 The primary outcome measure was the change of VA in the amblyopic eye from baseline to 6  
269 months.

270 The secondary outcome measures were as follows:

- 271 1) the change of VA in the amblyopic eye from baseline to 3 months,  
272 2) the proportions of patients with VA of 20/32 or better in the amblyopic eye at 6 months,  
273 3) the proportions of patients with acuity decrease of 1 line or more in the fellow eye at 6 months.

274

275 **10. Sample Size Estimation and Statistical Analysis**

276 **10.1 Sample Size**

277 On the basis of a prior study,<sup>12</sup> a sample size of 100 participants was estimated and would have 80%  
278 power and a type I error of 5% to detect a difference between groups of 0.15 logMAR in 6-month mean  
279 VA change, under the assumption of a standard deviation (SD) of 0.25 logMAR in VA change and 10%  
280 loss to follow-up. The sample size was calculated using G\*Power software (version 3.1).

281 **10.2 Data analysis**

282 An intention-to-treat analysis are performed to evaluate the effect of two treatments on VA. The  
283 mean difference and relative risk (RR) with a 2-sided 95% confidence interval (CI) are estimated for  
284 primary and secondary outcomes using the univariate linear regression and univariate logistic  
285 regression.

286 The outcomes based on per-protocol analysis are adjusted for age, sex, and cause of amblyopia using  
287 multivariate linear regression and multivariate logistic regression.

288 Comparison between groups was performed using the independent sample t test, Wilcoxon rank-sum  
289 test, Pearson chi-square test or Fisher exact test as appropriate. A change of 0.1 logMAR values was  
290 equivalent to a change of 1 line in VA.

291 All analyses are performed using the open source R statistical software (R Foundation, Vienna,  
292 Austria). Statistical significance is defined as  $P < 0.05$  with 2-sided testing.

293

294 **Reference**

295

- 296 1. Simons K. Preschool vision screening: rationale, methodology and outcome. *Surv*



- 297 *Ophthalmol.* Jul-Aug 1996;41(1):3-30.
- 298 2. Attebo K, Mitchell P, Cumming R, Smith W, Jolly N, Sparkes R. Prevalence and causes of  
299 amblyopia in an adult population. *Ophthalmology.* Jan 1998;105(1):154-9.
- 300 3. Wallace DK, Repka MX, Lee KA, et al. Amblyopia Preferred Practice Pattern®.  
301 *Ophthalmology.* 2018/01/01/ 2018;125(1):P105-P142. doi:10.1016/j.ophtha.2017.10.008
- 302 4. Flynn JT. 17th annual Frank Costenbader Lecture. Amblyopia revisited. *J Pediatr*  
303 *Ophthalmol Strabismus.* Jul-Aug 1991;28(4):183-201.
- 304 5. PEDIG. A randomized trial of atropine vs. patching for treatment of moderate amblyopia  
305 in children. *Arch Ophthalmol.* Mar 2002;120(3):268-78.
- 306 6. PEDIG. 419 ↑ A comparison of atropine and patching treatments for moderate amblyopia  
307 by patient age, cause of amblyopia, depth of amblyopia, and other factors. *Ophthalmology.*  
308 Aug 2003;110(8):1632-7; discussion 1637-8. doi:10.1016/s0161-6420(03)00500-1
- 309 7. Foley-Nolan A, McCann A, O'Keefe M. Atropine penalisation versus occlusion as the  
310 primary treatment for amblyopia. *Br J Ophthalmol.* Jan 1997;81(1):54-7.
- 311 8. Repka MX, Kraker RT, Beck RW, et al. Treatment of severe amblyopia with weekend  
312 atropine: results from 2 randomized clinical trials. *J aapos.* Jun 2009;13(3):258-63.  
313 doi:10.1016/j.jaapos.2009.03.002
- 314 9. Repka M, Ray J. The efficacy of optical and pharmacological penalization.  
315 *Ophthalmology.* 1993;100(5):769-74; discussion 774-5.
- 316 10. Simons K, Stein L, Sener E, Vitale S, Guyton D. Full-time atropine, intermittent atropine,  
317 and optical penalization and binocular outcome in treatment of strabismic amblyopia.  
318 *Ophthalmology.* 1997;104(12):2143-55.

- 319 11. Scheiman MM, Hertle RW, Beck RW, et al. Randomized trial of treatment of amblyopia in  
320 children aged 7 to 17 years. *Arch Ophthalmol.* Apr 2005;123(4):437-47.  
321 doi:10.1001/archopht.123.4.437
- 322 12. Holmes JM, Kraker RT, Beck RW, et al. A randomized trial of prescribed patching  
323 regimens for treatment of severe amblyopia in children. *Ophthalmology.* Nov  
324 2003;110(11):2075-87.  
325
