# Supplementary material
Source: PubMed Central journal article supplement (PMC8283662)
Supplement: jamaophthalmol-e212413-s002.pdf [file jamaophthalmol-e212413-s002.pdf]

## Supplemental Online Content

Wang S, Wen W, Zhu W, et al. Effect of combined atropine and patching vs patching alone for treatment of severe amblyopia in children aged 3 to 12 years: a randomized clinical trial. *JAMA Ophthalmol*. Published online July 15, 2021. doi:10.1001/jamaophthalmol.2021.2413

**eTable 1.** Baseline Characteristics According to Treatment Group (Per-protocol Analysis)

**eTable 2.** Patient Adherence to the Prescribed Treatment (Intention-to-treat Analysis)

**eTable 3.** Primary and Secondary Outcomes (Per-protocol Analysis)

**eTable 4.** Adjusted Analysis for Primary and Secondary Outcomes (Intention-to-treat analysis)

**eTable 5.** Adjusted Analysis for Primary and Secondary Outcomes (Per-protocol Analysis)

**eTable 6.** Visual Acuity in the Amblyopic Eye at the Primary Outcome Examination

**eTable 7.** Visual Acuity in the Fellow Eye at 6 months (Intention-to-treat Analysis)

**eFigure 1.** Change of Amblyopic-eye Visual Acuity at 3 Months and 6 Months

**eFigure 2.** Subgroup Analysis of Change in Amblyopic-eye Visual Acuity at 6 Months (Intention-to-treat analysis)

This supplemental material has been provided by the authors to give readers additional information about their work.

**eTable 1. Baseline Characteristics According to Treatment Group (Per-protocol Analysis)**

|                                                                    | <b>Atropine combined<br/>Patching Group</b> | <b>Patching Group</b> |
|--------------------------------------------------------------------|---------------------------------------------|-----------------------|
|                                                                    | <b>(n = 48)</b>                             | <b>(n = 48)</b>       |
| <b>Sex, No. (%)</b>                                                |                                             |                       |
| Male                                                               | 23 (48)                                     | 26 (54)               |
| Female                                                             | 25 (52)                                     | 22 (46)               |
| <b>Age at enrollment, No. (%)</b>                                  |                                             |                       |
| 3 to <7                                                            | 45 (94)                                     | 45 (94)               |
| 7 to <13                                                           | 3 (6)                                       | 3 (6)                 |
| Mean (SD), year                                                    | 5.08 (1.60)                                 | 4.90 (1.59)           |
| <b>Amblyopia cause, No. (%)</b>                                    |                                             |                       |
| Strabismus                                                         | 7 (15)                                      | 9 (19)                |
| Anisometropia                                                      | 28 (58)                                     | 30 (63)               |
| Mixed                                                              | 13 (27)                                     | 9 (19)                |
| <b>Type of Strabismus <sup>a</sup>, No. (%)</b>                    |                                             |                       |
| Esotropia                                                          | 11 (55)                                     | 10(56)                |
| Exotropia                                                          | 9 (45)                                      | 8 (44)                |
| <b>Duration of prior amblyopia treatment <sup>b</sup>, No. (%)</b> |                                             |                       |
| 0                                                                  | 43 (90)                                     | 44 (92)               |
| 1 to 15                                                            | 3 (6)                                       | 3 (6)                 |
| 16 to 30                                                           | 2 (4)                                       | 1 (2)                 |
| <b>Distance VA <sup>c</sup> in AE, No. (%)</b>                     |                                             |                       |
| 0.2 (20/100)                                                       | 4 (8)                                       | 9 (19)                |
| 0.16 (20/125)                                                      | 15 (31)                                     | 20 (42)               |
| 0.1 (20/200)                                                       | 18 (38)                                     | 11 (23)               |
| 0.05 (20/400)                                                      | 7 (15)                                      | 4 (8)                 |
| 0.04 (20/500)                                                      | 4 (8)                                       | 4 (8)                 |
| Mean (SD)                                                          |                                             |                       |
| LogMAR                                                             | 0.99 (0.22)                                 | 0.93 (0.24)           |
| Snellen equivalent                                                 | 20/200                                      | 20/200 +3             |
| <b>Distance VA <sup>c</sup> in FE, No. (%)</b>                     |                                             |                       |
| 1.0 (20/20)                                                        | 20 (42)                                     | 15 (31)               |
| 0.8 (20/25)                                                        | 14 (29)                                     | 16 (33)               |
| 0.6 (20/32)                                                        | 8 (17)                                      | 10 (21)               |
| 0.5 (20/40)                                                        | 3 (6)                                       | 0 (0)                 |
| 0.4 (20/50)                                                        | 3 (6)                                       | 7 (15)                |
| Mean (SD)                                                          |                                             |                       |
| LogMAR                                                             | 0.11 (0.12)                                 | 0.14 (0.14)           |
| Snellen equivalent                                                 | 20/32 +4                                    | 20/32 +3              |
| <b>Interocular VA difference, mean (SD), line</b>                  | 8.86 (2.52)                                 | 7.87 (2.49)           |
| <b>AE refractive error <sup>d</sup>, mean (SD), D</b>              | 6.14 (2.30)                                 | 6.76 (2.46)           |
| <b>FE refractive error <sup>d</sup>, mean (SD), D</b>              | 2.59 (2.17)                                 | 3.29 (2.17)           |

---

SD = standard deviation; VA = visual acuity; AE = amblyopic eye; FE = fellow eye; logMAR = logarithm of the minimum angle of resolution; D = diopter.

a. Type of strabismus includes subjects with strabismic amblyopia or mixed amblyopia, thus the total number of strabismus type is not 96.

b. Prior amblyopia treatment only refers to spectacle wear. The duration of treatment is expressed in days.

c. The distance visual acuity is measured by Standard Logarithm Visual Acuity Chart, in parentheses approximate Snellen equivalent is provided.

d. Spherical equivalent in diopters.

---

**eTable 2. Patient Adherence to the Prescribed Treatment (Intention-to-treat Analysis)**

|                                 | First 3 months     |                   |            | Second 3 months    |                   |            | Total 6 months     |                   |            |
|---------------------------------|--------------------|-------------------|------------|--------------------|-------------------|------------|--------------------|-------------------|------------|
|                                 | AP group<br>(n=53) | P group<br>(n=55) | P<br>value | AP group<br>(n=53) | P group<br>(n=55) | P<br>value | AP group<br>(n=53) | P group<br>(n=55) | P<br>value |
| <b>Patching time, No. (%)</b>   |                    |                   |            |                    |                   |            |                    |                   |            |
| Excellent                       | 36 (68)            | 37 (67)           | .76        | 31 (58)            | 22 (40)           | .11        | 32 (60)            | 29 (53)           | .33        |
| Moderate                        | 12 (23)            | 9 (16)            |            | 9 (17)             | 16 (29)           |            | 16 (30)            | 17 (31)           |            |
| Poor                            | 5 (9)              | 9 (16)            |            | 13 (25)            | 17 (31)           |            | 5 (9)              | 9 (16)            |            |
| <b>Use of Atropine, No. (%)</b> |                    |                   |            |                    |                   |            |                    |                   |            |
| Excellent                       | 38 (72)            | —                 | —          | 40 (75)            | —                 | —          | 40 (75)            | —                 | —          |
| Moderate                        | 15 (28)            | —                 |            | 8 (15)             | —                 |            | 10 (19)            | —                 |            |
| Poor                            | 0 (0)              | —                 |            | 5 (9)              | —                 |            | 3 (6)              | —                 |            |

AP group = atropine combined patching group; P group = patching group.

**eTable 3. Primary and Secondary Outcomes (Per-protocol Analysis)**

| Outcome                                                                        | AP Group    | P Group     | Mean Difference /<br>RR (95% CI) | P Value |
|--------------------------------------------------------------------------------|-------------|-------------|----------------------------------|---------|
|                                                                                | (n =48)     | (n =48)     |                                  |         |
| <b>Primary outcome</b>                                                         |             |             |                                  |         |
| <b>Change in AE VA at 6 months, mean (SD)</b>                                  |             |             |                                  |         |
| LogMAR                                                                         | 0.73 (0.21) | 0.58 (0.23) | 0.15 (0.06, 0.24)                | .001    |
| Line                                                                           | 7.3 (2.1)   | 5.8 (2.3)   | 1.5 (0.6, 2.4)                   | .001    |
| <b>Secondary outcomes</b>                                                      |             |             |                                  |         |
| <b>Change in AE VA at 3 months, mean (SD)</b>                                  |             |             |                                  |         |
| LogMAR                                                                         | 0.56 (0.23) | 0.42 (0.23) | 0.14 (0.05, 0.23)                | .004    |
| Line                                                                           | 5.6 (2.3)   | 4.2 (2.3)   | 1.4 (0.5, 2.3)                   | .004    |
| <b>AE VA <math>\geq</math>20/32 at 6 months, No. (%)</b>                       | 29 (60)     | 19 (40)     | 1.53 (0.86, 2.72)                | .15     |
| <b>FE VA decrease <math>\geq</math>1 line at 6 months<sup>a</sup>, No. (%)</b> | 0 (0)       | 0 (0)       | —                                | —       |

AP group = atropine combined patching group; P group = patching group; AE = amblyopic eye; VA = visual acuity; SD = standard deviation; FE = fellow eye; logMAR = logarithm of the minimum angle of resolution; RR = relative risk; CI = confidence interval.

a. The number in both groups is zero, so the relative risk cannot be calculated.

**eTable 4. Adjusted Analysis for Primary and Secondary Outcomes (Intention-to-treat analysis)**

| Outcome                                                        | AP Group    | P Group     | Adjusted Mean Difference / Adjusted RR <sup>a</sup> (95% CI) | P Value |
|----------------------------------------------------------------|-------------|-------------|--------------------------------------------------------------|---------|
|                                                                | (n =53)     | (n =55)     |                                                              |         |
| <b>Primary outcome</b>                                         |             |             |                                                              |         |
| <b>Change in AE VA at 6 months, mean (SD)</b>                  |             |             |                                                              |         |
| LogMAR                                                         | 0.72 (0.20) | 0.58 (0.22) | 0.14 (0.05, 0.22)                                            | .002    |
| Line                                                           | 7.2 (2.0)   | 5.8 (2.2)   | 1.4 (0.5, 2.2)                                               | .002    |
| <b>Secondary outcomes</b>                                      |             |             |                                                              |         |
| <b>Change in AE VA at 3 months, mean (SD)</b>                  |             |             |                                                              |         |
| LogMAR                                                         | 0.54 (0.24) | 0.41 (0.22) | 0.13 (0.04, 0.22)                                            | .004    |
| Line                                                           | 5.4 (2.4)   | 4.1 (2.2)   | 1.3 (0.4, 2.2)                                               | .004    |
| <b>AE VA ≥20/32 at 6 months, No. (%)</b>                       | 32 (60)     | 22 (40)     | 1.48 (0.85, 2.59)                                            | .17     |
| <b>FE VA decrease ≥1 line at 6 months<sup>b</sup>, No. (%)</b> | 0 (0)       | 0 (0)       | —                                                            | —       |

AP group = atropine combined patching group; P group = patching group; AE = amblyopic eye; VA = visual acuity; SD = standard deviation; FE = fellow eye; logMAR = logarithm of the minimum angle of resolution; RR = relative risk; CI = confidence interval.

a. The mean difference and RR were adjusted for age, sex, and cause of amblyopia.

b. The number in both groups is zero, so the relative risk cannot be calculated.

**eTable 5. Adjusted Analysis for Primary and Secondary Outcomes (Per-protocol Analysis)**

| Outcome                                                                                                                                                                                                                                                                                                                                                                                                                                               | AP Group    | P Group     | Adjusted Mean Difference / Adjusted RR <sup>a</sup> (95% CI) | P Value |
|-------------------------------------------------------------------------------------------------------------------------------------------------------------------------------------------------------------------------------------------------------------------------------------------------------------------------------------------------------------------------------------------------------------------------------------------------------|-------------|-------------|--------------------------------------------------------------|---------|
|                                                                                                                                                                                                                                                                                                                                                                                                                                                       | (n =48)     | (n =48)     |                                                              |         |
| <b>Primary outcome</b>                                                                                                                                                                                                                                                                                                                                                                                                                                |             |             |                                                              |         |
| <b>Change in AE VA at 6 months, mean (SD)</b>                                                                                                                                                                                                                                                                                                                                                                                                         |             |             |                                                              |         |
| LogMAR                                                                                                                                                                                                                                                                                                                                                                                                                                                | 0.73 (0.21) | 0.58 (0.23) | 0.15 (0.06, 0.24)                                            | .001    |
| Line                                                                                                                                                                                                                                                                                                                                                                                                                                                  | 7.3 (2.1)   | 5.8 (2.3)   | 1.5 (0.6, 2.4)                                               | .001    |
| <b>Secondary outcomes</b>                                                                                                                                                                                                                                                                                                                                                                                                                             |             |             |                                                              |         |
| <b>Change in AE VA at 3 months, mean (SD)</b>                                                                                                                                                                                                                                                                                                                                                                                                         |             |             |                                                              |         |
| LogMAR                                                                                                                                                                                                                                                                                                                                                                                                                                                | 0.56 (0.23) | 0.42 (0.23) | 0.14 (0.04, 0.23)                                            | .005    |
| Line                                                                                                                                                                                                                                                                                                                                                                                                                                                  | 5.6 (2.3)   | 4.2 (2.3)   | 1.4 (0.4, 2.3)                                               | .005    |
| <b>AE VA ≥20/32 at 6 months, No. (%)</b>                                                                                                                                                                                                                                                                                                                                                                                                              | 29 (60)     | 19 (40)     | 1.57 (0.88, 2.82)                                            | .13     |
| <b>FE VA decrease ≥1 line at 6 months<sup>b</sup>, No. (%)</b>                                                                                                                                                                                                                                                                                                                                                                                        | 0 (0)       | 0 (0)       | —                                                            | —       |
| <p>AP group = atropine combined patching group; P group = patching group; AE = amblyopic eye; VA = visual acuity; SD = standard deviation; FE = fellow eye; logMAR = logarithm of the minimum angle of resolution; RR = relative risk; CI = confidence interval.</p> <p>a. The mean difference and RR were adjusted for age, sex, and cause of amblyopia.</p> <p>b. The number in both groups is zero, so the relative risk cannot be calculated.</p> |             |             |                                                              |         |

**eTable 6. Visual Acuity in the Amblyopic Eye at the Primary Outcome Examination**

|                                                                                                                                        | Intention-to-treat Analysis      |                | Per-protocol Analysis            |                |
|----------------------------------------------------------------------------------------------------------------------------------------|----------------------------------|----------------|----------------------------------|----------------|
|                                                                                                                                        | Atropine combined patching Group | Patching Group | Atropine combined patching Group | Patching Group |
|                                                                                                                                        | (n=53)                           | (n=55)         | (n=48)                           | (n=48)         |
| <b>Change of lines in AE VA at 6 months, No. (%)</b>                                                                                   |                                  |                |                                  |                |
| 0                                                                                                                                      | 0 (0)                            | 1 (2)          | 0 (0)                            | 1 (2)          |
| +1                                                                                                                                     | 0 (0)                            | 1 (2)          | 0 (0)                            | 1 (2)          |
| +2                                                                                                                                     | 0 (0)                            | 0 (0)          | 0 (0)                            | 0 (0)          |
| +3                                                                                                                                     | 0 (0)                            | 5 (9)          | 0 (0)                            | 4 (8)          |
| +4                                                                                                                                     | 2 (4)                            | 4 (7)          | 2 (4)                            | 4 (8)          |
| +5                                                                                                                                     | 11 (21)                          | 11 (20)        | 9 (19)                           | 10 (21)        |
| +6                                                                                                                                     | 15 (28)                          | 22 (40)        | 13 (27)                          | 19 (40)        |
| +7                                                                                                                                     | 5 (9)                            | 5 (9)          | 5 (10)                           | 4 (8)          |
| +8                                                                                                                                     | 11 (21)                          | 2 (4)          | 10 (21)                          | 1 (2)          |
| +9                                                                                                                                     | 2 (4)                            | 0 (0)          | 2 (4)                            | 0 (0)          |
| +10                                                                                                                                    | 2 (4)                            | 2 (4)          | 2 (4)                            | 2 (4)          |
| +11                                                                                                                                    | 4 (8)                            | 1 (2)          | 4 (8)                            | 1 (2)          |
| +12                                                                                                                                    | 1 (2)                            | 0 (0)          | 1 (2)                            | 0 (0)          |
| +13                                                                                                                                    | 0 (0)                            | 0 (0)          | 0 (0)                            | 0 (0)          |
| +14                                                                                                                                    | 0 (0)                            | 1 (2)          | 0 (0)                            | 1 (2)          |
| Mean (SD), line                                                                                                                        | 7.2 (2.0)                        | 5.8 (2.2)      | 7.3 (2.1)                        | 5.8 (2.3)      |
| <b>Distribution of AE VA <sup>a</sup> at 6 months, No. (%)</b>                                                                         |                                  |                |                                  |                |
| 0.8 (20/25)                                                                                                                            | 2 (4)                            | 6 (11)         | 1 (2)                            | 4 (8)          |
| 0.7 (20/30)                                                                                                                            | 23 (43)                          | 10 (18)        | 21 (44)                          | 9 (19)         |
| 0.6 (20/32)                                                                                                                            | 7 (13)                           | 6 (11)         | 7 (15)                           | 6 (13)         |
| 0.5 (20/40)                                                                                                                            | 10 (19)                          | 9 (16)         | 9 (19)                           | 8 (17)         |
| 0.4 (20/50)                                                                                                                            | 2 (4)                            | 12 (22)        | 2 (4)                            | 11 (23)        |
| 0.3 (20/63)                                                                                                                            | 8 (15)                           | 4 (7)          | 7 (15)                           | 3 (6)          |
| 0.25 (20/80)                                                                                                                           | 0 (0)                            | 0 (0)          | 0 (0)                            | 0 (0)          |
| 0.2 (20/100)                                                                                                                           | 0 (0)                            | 2 (4)          | 0 (0)                            | 2 (4)          |
| 0.16 (20/125)                                                                                                                          | 0 (0)                            | 6 (11)         | 0 (0)                            | 5 (10)         |
| 0.1 (20/200)                                                                                                                           | 1 (2)                            | 0 (0)          | 1 (2)                            | 0 (0)          |
| Mean (SD)                                                                                                                              |                                  |                |                                  |                |
| LogMAR                                                                                                                                 | 0.26 (0.17)                      | 0.34 (0.22)    | 0.26 (0.17)                      | 0.35 (0.21)    |
| Snellen equivalent                                                                                                                     | 20/40 +2                         | 20/50 +3       | 20/40 +2                         | 20/50 +2       |
| AE = amblyopic eye; VA = visual acuity; SD = standard deviation; logMAR = logarithm of the minimum angle of resolution.                |                                  |                |                                  |                |
| a. The visual acuity is measured by Standard Logarithm Visual Acuity Chart, in parentheses approximate Snellen equivalent is provided. |                                  |                |                                  |                |



**eTable 7. Visual Acuity in the Fellow Eye at 6 months (Intention-to-treat Analysis)**

|                                                                | <b>Atropine combined<br/>Patching Group</b> | <b>Patching<br/>Group</b> |
|----------------------------------------------------------------|---------------------------------------------|---------------------------|
|                                                                | (n=53)                                      | (n=55)                    |
| <b>Change of lines in FE VA at 6 months, No. (%)</b>           |                                             |                           |
| -0.5                                                           | 3 (6)                                       | 2 (4)                     |
| 0                                                              | 29 (55)                                     | 24 (44)                   |
| +0.5                                                           | 11 (21)                                     | 9 (16)                    |
| +1                                                             | 4 (8)                                       | 12 (22)                   |
| +1.5                                                           | 2 (4)                                       | 2 (4)                     |
| +2                                                             | 1 (2)                                       | 3 (5)                     |
| +2.5                                                           | 3 (6)                                       | 1 (2)                     |
| +3                                                             | 0 (0)                                       | 2 (4)                     |
| Mean (SD) <sup>a</sup> , line                                  | 0.40 (0.73)                                 | 0.62 (0.83)               |
| <b>Distribution of FE VA <sup>b</sup> at 6 months, No. (%)</b> |                                             |                           |
| 1.0 (20/20)                                                    | 27 (51)                                     | 28 (51)                   |
| 0.8 (20/25)                                                    | 12 (23)                                     | 16 (29)                   |
| 0.7 (20/30)                                                    | 11 (21)                                     | 4 (7)                     |
| 0.6 (20/32)                                                    | 3 (6)                                       | 1 (2)                     |
| 0.5 (20/40)                                                    | 0 (0)                                       | 5 (9)                     |
| 0.4 (20/50)                                                    | 0 (0)                                       | 1 (2)                     |
| Mean (SD)                                                      |                                             |                           |
| LogMAR                                                         | 0.06 (0.07)                                 | 0.07 (0.10)               |
| Snellen equivalent                                             | 20/25 +2                                    | 20/25 +1                  |

FE = fellow eye; VA = visual acuity; SD = standard deviation; logMAR = logarithm of the minimum angle of resolution.

a. For the difference of mean change in FE VA from baseline to month 6 between atropine combined patching group and patching group,  $p = .16$ .

b. The visual acuity is measured by Standard Logarithm Visual Acuity Chart, in parentheses approximate Snellen equivalent is provided.

**eFigure 1. Change of Amblyopic-eye Visual Acuity at 3 Months and 6 Months**

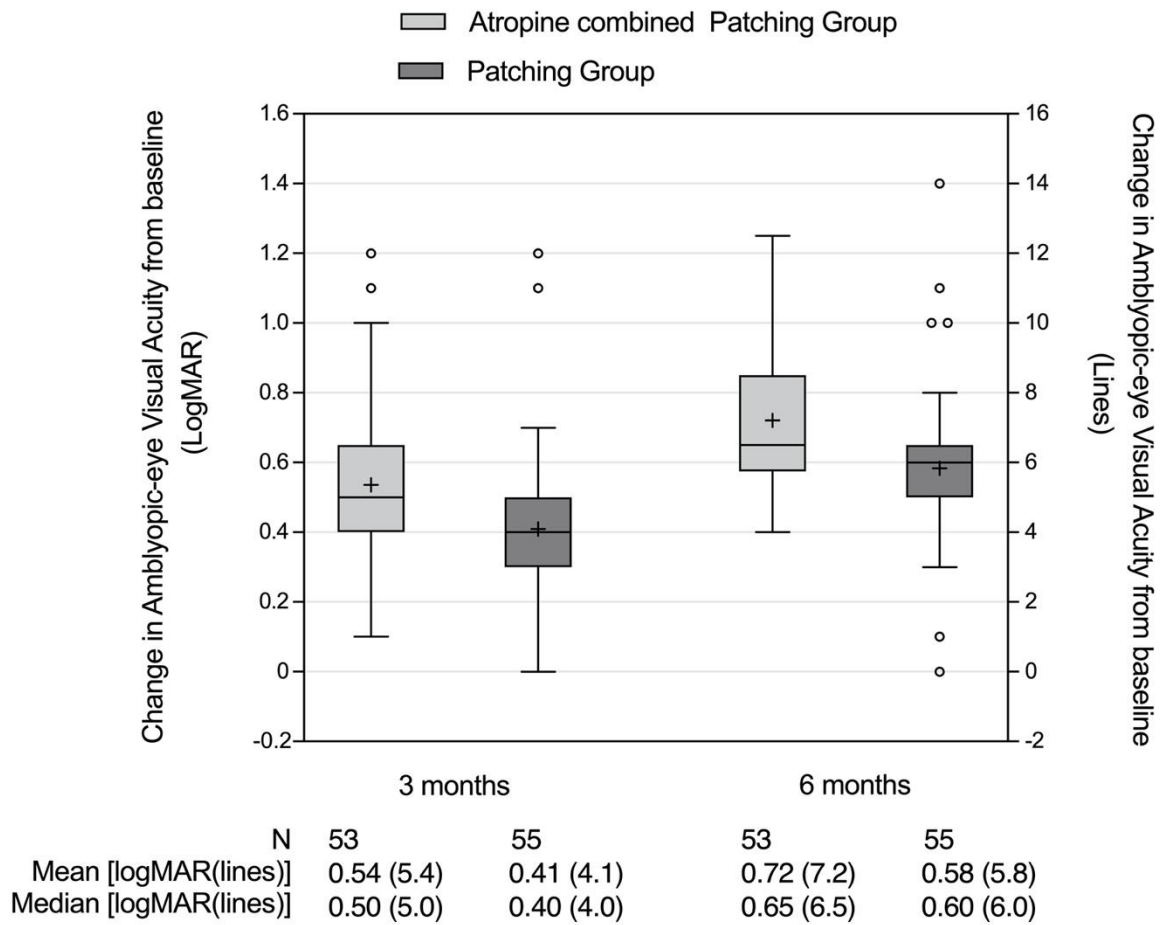

eFigure 1. According to intention-to-treat analysis, changes in amblyopic-eye visual acuity of the two groups at 3 months and 6 months are shown. The light gray box represents the atropine combined patching group and the dark gray box represents the patching group. The lower and upper ends of the box indicate the first and the third quartiles of the data. The line in the box is the median, which is the second quartile. The “+” indicates the mean. The whisker shown is 1.5 times the interquartile range and the circles plotted beyond the whiskers are outlier data.

eFigure 2. Subgroup Analysis\* of Change in Amblyopic-eye Visual Acuity at 6 Months (Intention-to-treat analysis)

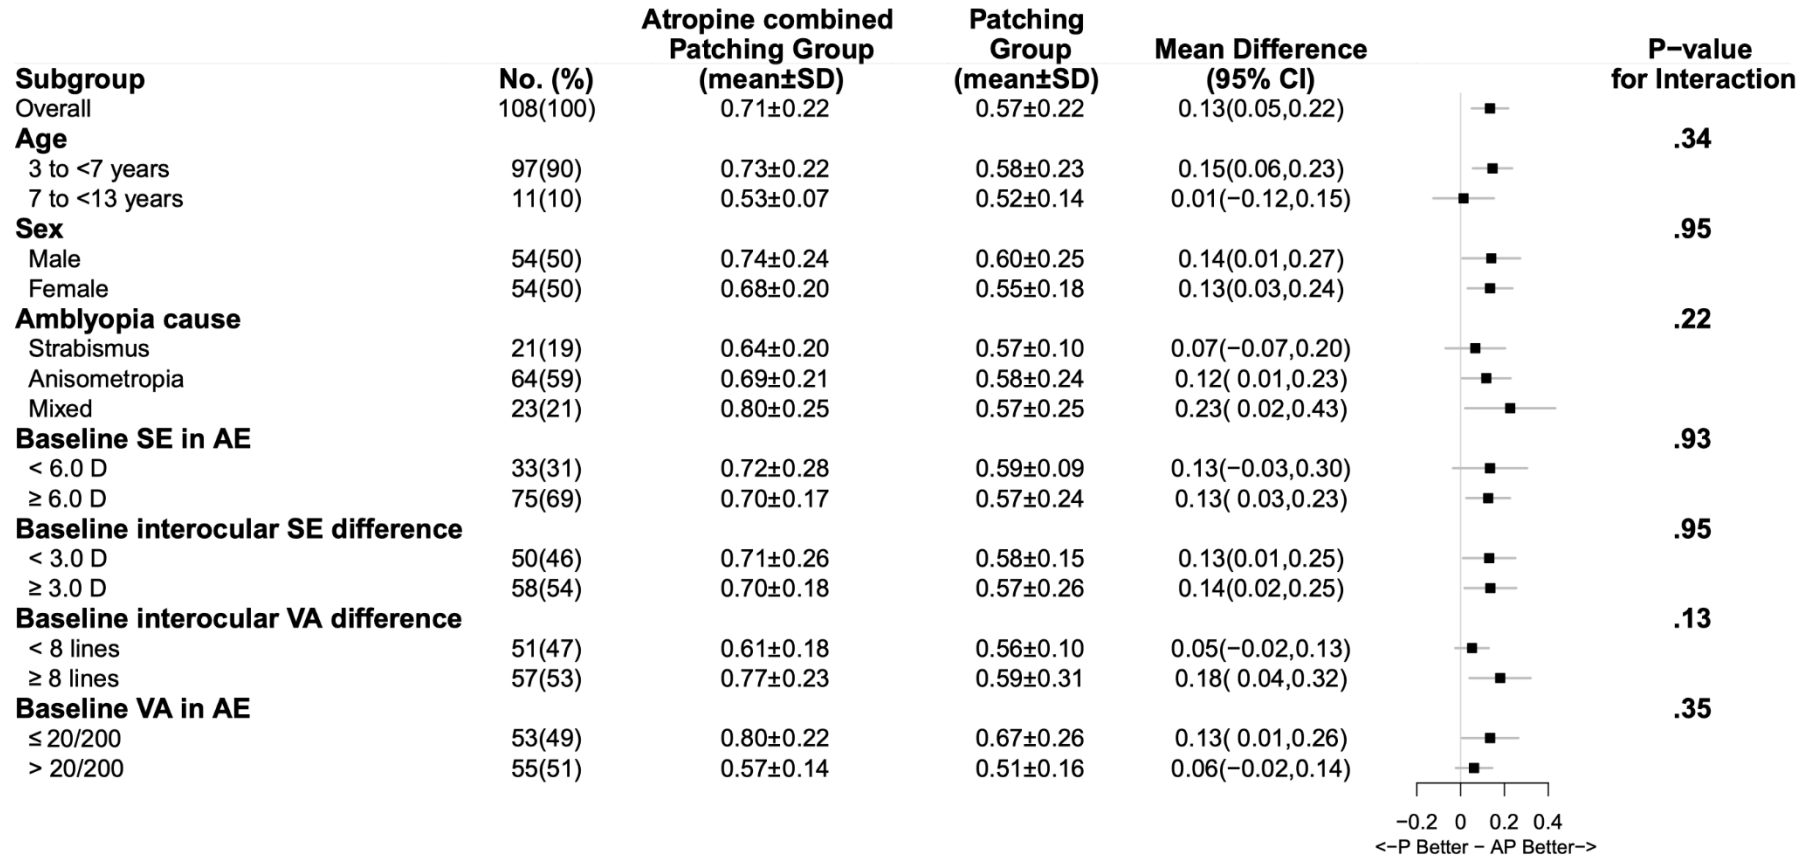

eFigure 2. No significant interaction was found between the treatment groups and the baseline characteristics. SE = spherical equivalent; AE = amblyopic eye; D = diopter; VA = visual acuity; SD = standard deviation; CI = confidence interval. \*Since subgroup analysis was not pre-specified, the results of it should be considered exploratory.
