# Supplementary material
Source: PubMed Central journal article supplement (PMC8283662)
Supplement: jamaophthalmol-e212413-s003.pdf [file jamaophthalmol-e212413-s003.pdf]

## Data Sharing Statement

Wang. Effect of Combined Atropine and Patching vs Patching Alone for Treatment of Severe Amblyopia in Children Aged 3 to 12 Years.

*JAMA Ophthalmol.* Published July 15, 2021.

doi:10.1001/jamaophthalmol.2021.2413

### Data

**Data available:** Yes

**Data types:** Deidentified participant data

**How to access data:** [sylvia0921@foxmail.com](mailto:sylvia0921@foxmail.com)

**When available:** With publication

### Supporting Documents

**Document types:** None

### Additional Information

**Who can access the data:** researchers whose proposed use of the data has been approved

**Types of analyses:** for any purpose

**Mechanisms of data availability:** with a signed data access agreement
